# Supplementary material for: Extracts Prepared from Feed Supplements Containing Wood Lignans Improve Intestinal Health by Strengthening Barrier Integrity and Reducing Inflammation
Source: MDPI journal article supplement (doi:10.3390/molecules27196327), 2022-09-26
Supplement: s1 [file s1]

# Supplementary Table S1 and S2

Table S1: Comparison of SOD activity and GSH and LPO concentrations in oxidative lesion recovered from large intestine mucosa scrapings among groups of piglets experimentally inoculated with *B. hyodysenteriae* and treated with *Protect* starting 7 days pre (TBI) or 3 days post (TAI) inoculation. NC: negative control; PC: positive control; TBI: treatment before inoculation; TAI: treatment after inoculation. ns:  $p > 0.05$ , \*:  $p < 0.05$ , \*\*:  $p < 0.01$ .

| Marker | Group 1 | Group 2 | n 1 | n 2 | p value | Significance |
|--------|---------|---------|-----|-----|---------|--------------|
| SOD    | NC      | PC      | 10  | 8   | 0.0115  | *            |
| SOD    | PC      | TBI     | 8   | 10  | 0.0090  | **           |
| SOD    | PC      | TAI     | 8   | 10  | 0.7736  | ns           |
| SOD    | TBI     | TAI     | 10  | 10  | 0.0832  | ns           |
| GSH    | NC      | PC      | 10  | 9   | >0.9999 | ns           |
| GSH    | PC      | TBI     | 9   | 10  | 0.2556  | ns           |
| GSH    | PC      | TAI     | 9   | 10  | 0.8149  | ns           |
| GSH    | TBI     | TAI     | 10  | 10  | 0.8327  | ns           |
| LPO    | NC      | PC      | 10  | 8   | 0.0217  | *            |
| LPO    | PC      | TBI     | 8   | 10  | 0.9739  | ns           |
| LPO    | PC      | TAI     | 8   | 8   | 0.0215  | *            |
| LPO    | TBI     | TAI     | 10  | 8   | 0.0531  | ns           |

Table S2: Comparison of FITC-dextran recovery among groups of piglets experimentally inoculated with *B. hyodysenteriae* and treated with *Protect* starting 7 days pre (TBI) inoculation. NC: negative control; PC: positive control; TBI: treatment before inoculation. ns:  $p > 0.05$ , \*\*\*\*:  $p < 0.0001$ .

| Group 1 | Group 2 | n 1 | n 2 | p value | Significance |
|---------|---------|-----|-----|---------|--------------|
| NC      | PC      | 10  | 10  | 0.9979  | ns           |
| PC      | TBI     | 10  | 10  | <0.0001 | ****         |
